# Supplementary material for: Clinical validation of the SIMPLE classification for optical diagnosis of colorectal polyps
Source: PubMed Central journal article supplement — Endosc Int Open. 2021 Apr 22;9(5):E684–92. doi: 10.1055/a-1388-6694 (PMC8062223; doi:10.1055/a-1388-6694), 2021-04-22
Supplement: 2155supmat_10-1055-a-1388-6694.pdf [file 2155supmat_10-1055-a-1388-6694.pdf]

## Supplementary material

**Supplemental table 1** Simplified Identification Method for Polyp Labeling during Endoscopy (SIMPLE) classification for small colorectal polyps [5].

|                 | Non-neoplastic features             |                                                     | Neoplastic features                                 |         |
|-----------------|-------------------------------------|-----------------------------------------------------|-----------------------------------------------------|---------|
|                 | Hyperplastic polyp                  | SSA                                                 | Adenoma                                             |         |
| Surface pattern | Round pit                           | Open/dilated/(dark) pit                             | Not round structure:<br>Oval<br>Tubular<br>Branched |         |
| Vessel pattern  | None<br>Isolated<br>Lacy<br>Regular | None<br>Isolated<br>Lacy<br>Irregular/indistinctive | Thick vessels                                       | Regular |
| Lesion border   |                                     |                                                     |                                                     |         |

SSA, sessile serrated adenoma.

## Supplementary material

**Supplemental table 2.** ADR, PDR, correct surveillance interval and correct polyp diagnosis for each endoscopist involved in the study.

| Endoscopist | Total patients | No of polyps | No of diminutive polyp | Unretrieved polyps (%) | ADR (%) | PDR (%) | Correct polyp diagnosis (%) | Correct surveillance interval – Diminutive polyps* (%) | Correct surveillance interval – Small polyps* (%) | % Polyps with high confidence diagnosis |
|-------------|----------------|--------------|------------------------|------------------------|---------|---------|-----------------------------|--------------------------------------------------------|---------------------------------------------------|-----------------------------------------|
| 1           | 64             | 69           | 53                     | 4.3                    | 40.6    | 68.8    | 80.0                        | 98.4                                                   | 96.9                                              | 79.7                                    |
| 2           | 70             | 73           | 48                     | 4.1                    | 35.7    | 60.0    | 57.8                        | 98.6                                                   | 97.1                                              | 61.6                                    |
| 3           | 25             | 24           | 15                     | 8.3                    | 36.0    | 48.0    | 57.1                        | 100                                                    | 100                                               | 62.5                                    |
| 4           | 61             | 58           | 38                     | 5.2                    | 32.8    | 47.5    | 79.4                        | 100                                                    | 100                                               | 58.6                                    |
| 5           | 38             | 28           | 27                     | 0.0                    | 23.7    | 42.1    | 62.5                        | 100                                                    | 100                                               | 57.1                                    |
| 6           | 23             | 31           | 28                     | 3.2                    | 60.9    | 65.2    | 42.3                        | 100                                                    | 95.7                                              | 83.9                                    |
| 7           | 52             | 98           | 75                     | 16.3                   | 48.1    | 73.1    | 80.4                        | 100                                                    | 98.1                                              | 83.7                                    |
| 8           | 24             | 40           | 16                     | 20.0                   | 50.0    | 66.7    | 60.0                        | 100                                                    | 100                                               | 50.0                                    |
| 9           | 31             | 27           | 20                     | 11.1                   | 32.3    | 51.6    | 52.6                        | 100                                                    | 96.8                                              | 70.4                                    |
| 10          | 11             | 9            | 1                      | 0.0                    | 45.5    | 54.5    | 33.3                        | 100                                                    | 100                                               | 66.7                                    |
| Total       | 399            | 457          | 321                    | 8.5                    | 38.8    | 58.6    | 65.9                        | 99.5                                                   | 98.2                                              | 69.6                                    |

ADR. adenoma detection rate; PDR. polyp detection rate.

\*Based on the 2020 US Multi-Society Task Force guidelines
